# Supplementary material for: Loss of alanine-glyoxylate and serine-pyruvate aminotransferase expression accelerated the progression of hepatocellular carcinoma and predicted poor prognosis
Source: J Transl Med. 2019 Nov 26;17:390. doi: 10.1186/s12967-019-02138-5 (PMC6880547; doi:10.1186/s12967-019-02138-5)
Supplement: Supplementary file 1 — Additional file 1: Table S1. Clinical characteristics of patients in HCC tissue array cohort at the time of surgery (n = 101). [file 12967_2019_2138_MOESM1_ESM.xls]

## Sheet: Sheet2
	Table S1 Clinical characteristics of patients in HCC tissue array cohort at the time of surgery (n=101)
	Clinical		#	Range	%
	Age (yr)	>50	56	51-79	55.4
		≤50	45	31-50	44.6
	Gender	male	75		74.3
		female	26		25.7
	HBsAg	postive	90		89.1
		negative	9		8.9
		n.a.	2		2
	Portal vein tumor thrombus	No	55		54.5
		Yes	3		3
		n.a.	43		42.5
	Cirrhosis	Yes	68		67.3
		No	24		23.8
		n.a.	9		8.9
	Tumor number	Single	44		43.6
		Multiple	11		10.9
		n.a.	46		45.5
	AFP (ng/ml)	≤300	47	1.4-296.3	46.5
		>300	33	310.4-35350.0	32.7
		n.a.	21		20.8
	Vascular invasion	Yes	42		41.6
		No	59		58.4
	Tumor size (cm)	>3	54	3.5-12.0	53.5
		≤3	46	1.0-3.0	45.5
		n.a.	1		1
	Tumor Differentiation	Well	20		19.8
		Moderate	39		38.6
		Poor	42		41.6
	TNM Stage	I	43		42.6
		II	41		40.6
		III-IV	9		8.9
		n.a.	8		7.9
	n.a., not applicable
